# Supplementary material for: Targeting MCT-1 oncogene inhibits Shc pathway and xenograft tumorigenicity
Source: PubMed Central journal article supplement (PMC3717801; doi:10.18632/oncotarget.688), 2012-11-09
Supplement: oncotarget-03-1401-s002.pdf [file oncotarget-03-1401-s002.pdf]

## Targeting MCT-1 oncogene inhibits Shc pathway and xenograft tumorigenicity – Shih et al

**Supplementary Table 1.**

**Co-activation of MCT-1 and Shc genes in BCPs**

|                 | Shc<br>(high)     | Shc<br>(low)      |
|-----------------|-------------------|-------------------|
| MCT-1<br>(high) | <b>52 (56.5%)</b> | 16 (17.4%)        |
| MCT-1<br>(low)  | 11 (12.0%)        | <b>13 (14.1%)</b> |

$p < 0.006$  (hyperactivation: low expression of MCT-1 and Shc genes)

Supplementary Table 1: Co-activation of MCT-1 and Shc genes in breast cancer patients (BCPs). The TissueScan Breast Cancer Tissue cDNA arrays Panel BCRT III and BCRT IV (OriGene Technologies, Inc.) were analyzed by Q-RT-PCR analysis. MCT-1 and Shc mRNA levels in each sample were normalized to  $\beta$ -actin mRNA level. MCT-1 transcripts with more than a 2-fold induction and Shc transcripts with more than a 1.5-fold increase over the mean of normal breast tissues were defined as the gene high-activation. Accordingly, 56.5% of the BCPs (n=92) highly induce MCT-1 and Shc genes, but only 14.1% of tumor biopsies exhibit low-expression of both genes. The statistical analysis used Fisher's exact test. The association of the MCT-1 and Shc gene induction in BCPs is statically significant ( $< 0.006$ ).
